# Supplementary material for: Effect of an interactive text-messaging service on patient retention during the first year of HIV care in Kenya (WelTel Retain): an open-label, randomised parallel-group study
Source: PubMed Central journal article supplement — Lancet Public Health. Author manuscript; Available in PMC 2018 Apr 4. (PMC5884138; doi:10.1016/s2468-2667(17)30239-6), 2018-01-30
Supplement: NIHMS949537-supplement.pdf [file NIHMS949537-supplement.pdf]

# THE LANCET

## Public Health

### Supplementary appendix

This appendix formed part of the original submission and has been peer reviewed. We post it as supplied by the authors.

Supplement to: van der Kop ML, Muhula S, Nagide PI, et al. Effect of an interactive text-messaging service on patient retention during the first year of HIV care in Kenya (WelTel Retain): an open-label, randomised parallel-group study. *Lancet Public Health* 2018; published online Jan 17. [http://dx.doi.org/10.1016/S2468-2667\(17\)30239-6](http://dx.doi.org/10.1016/S2468-2667(17)30239-6).

Figure: Intervention and usual care

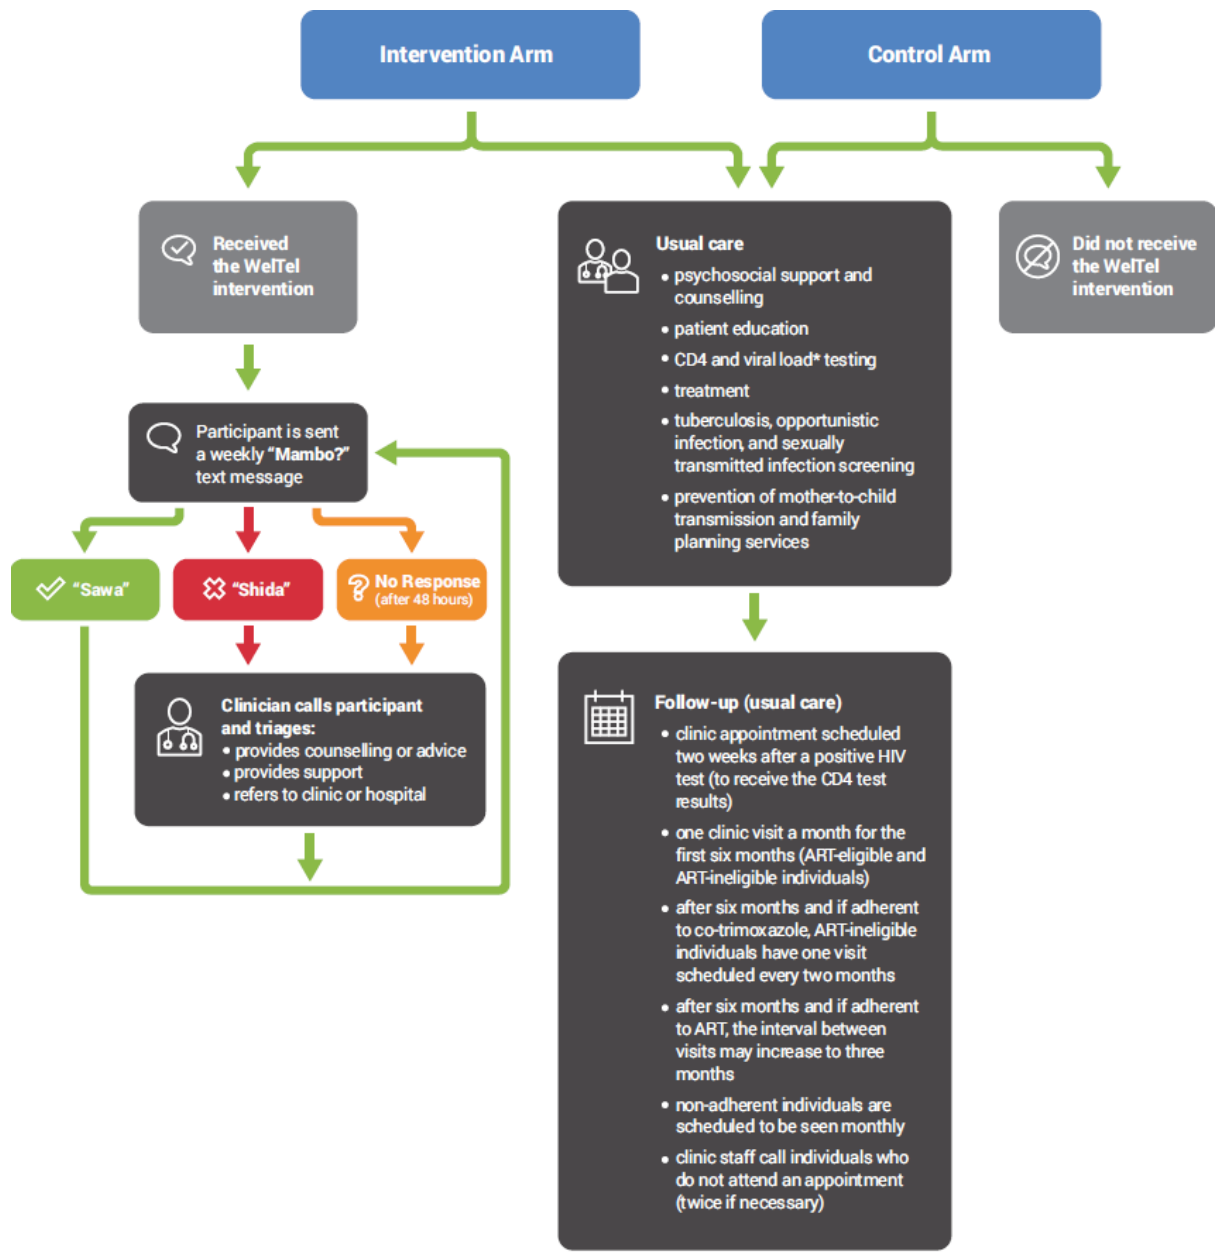

**Table 1: Comparison of participants who completed the 12-month questionnaire with participants who did not**

|                                     | <b>Completed questionnaire (n=435)</b> | <b>Did not complete questionnaire (n=265)</b> | <b>p value</b> |
|-------------------------------------|----------------------------------------|-----------------------------------------------|----------------|
| <b>Sex</b>                          |                                        |                                               | 0.183          |
| Female                              | 252 (58)                               | 167 (63)                                      |                |
| Male                                | 183 (42)                               | 98 (37)                                       |                |
|                                     |                                        |                                               | 0.250          |
| <b>Age (mean)*</b>                  | 34.08                                  | 33.20                                         |                |
|                                     |                                        |                                               |                |
| <b>Clinic</b>                       |                                        |                                               | 0.050          |
| Kibera                              | 300 (69)                               | 201 (76)                                      |                |
| Babadogo                            | 135 (31)                               | 64 (24)                                       |                |
|                                     |                                        |                                               |                |
| <b>Baseline CD4 count (median)†</b> | 310                                    | 265                                           | 0.040          |
|                                     |                                        |                                               |                |
| <b>ART eligible</b>                 |                                        |                                               | 0.491          |
| Yes                                 | 308 (71)                               | 181 (68)                                      |                |
| No                                  | 127 (29)                               | 66 (25)                                       |                |
|                                     |                                        |                                               |                |
| <b>Previous diagnosis</b>           |                                        |                                               | 0.376          |
| Yes                                 | 261 (60)                               | 150 (57)                                      |                |
| No                                  | 174 (40)                               | 115 (43)                                      |                |
|                                     |                                        |                                               |                |

All p values calculated for a  $\chi^2$  test except for \*which was calculated for a t-test and † for the Wilcoxon Rank Sum Test.

All values are n (percentage).

Baseline CD4 and ART eligible have 18 cases of missing data.

**Table 2: Comparison of intervention arm participants who completed the 12-month questionnaire with intervention arm participants who did not**

|                                     | <b>Completed questionnaire (n=220)</b> | <b>Did not complete questionnaire (n=129)</b> | <b>p value</b> |
|-------------------------------------|----------------------------------------|-----------------------------------------------|----------------|
| <b>Sex</b>                          |                                        |                                               | 0.675          |
| Female                              | 128 (58)                               | 78 (60)                                       |                |
| Male                                | 92 (42)                                | 51 (40)                                       |                |
| <b>Age (mean)*</b>                  | 34.32                                  | 33.83                                         | 0.665          |
| <b>Clinic</b>                       |                                        |                                               | 0.197          |
| Kibera                              | 153 (70)                               | 98 (76)                                       |                |
| Babadogo                            | 67 (30)                                | 31 (24)                                       |                |
| <b>Baseline CD4 count (median)†</b> | 302                                    | 240                                           | 0.032          |
| <b>ART eligible</b>                 |                                        |                                               | 0.817          |
| Yes                                 | 162 (74)                               | 89 (69)                                       |                |
| No                                  | 58 (26)                                | 30 (23)                                       |                |
| <b>Previous diagnosis</b>           |                                        |                                               | 0.757          |
| Yes                                 | 135 (61)                               | 77 (60)                                       |                |
| No                                  | 85 (39)                                | 52 (40)                                       |                |

All p values calculated for a  $\chi^2$  test except for \*which was calculated for a t-test and † for the Wilcoxon Rank Sum Test.

All values are n (percentage).

Baseline CD4 and ART eligible have 10 cases of missing data.
